# Supplementary material for: Anti-Sigma Factors in E. coli: Common Regulatory Mechanisms Controlling Sigma Factors Availability
Source: PubMed Central journal article supplement (PMC3861889; doi:10.2174/1389202911314060007), 2013-09
Supplement: CG-14-378_SD1.pdf [file CG-14-378_SD1.pdf]

# Supplementary Material

***rpoD* ( $\sigma^{70}$ ) Gene Local Context**  
 Synonyms: *alt*, sigma D factor, sigma 70 factor,  $\sigma^{70}$

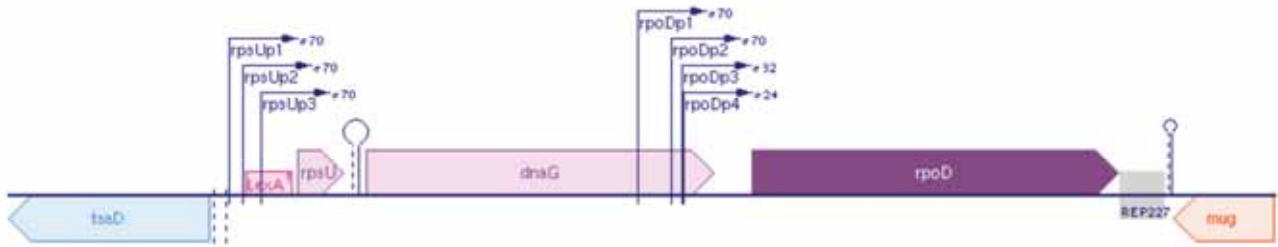

***rsd* (Anti- $\sigma^{70}$ ) Gene Local Context**  
 Synonyms: *yjaE*

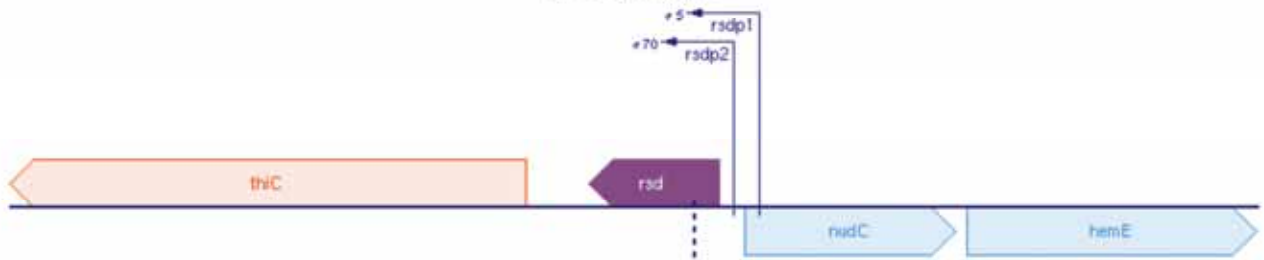

***hscC* (Anti- $\sigma^{70}$ ) Gene Local Context**  
 Synonyms: *ybeW*, Hsc62

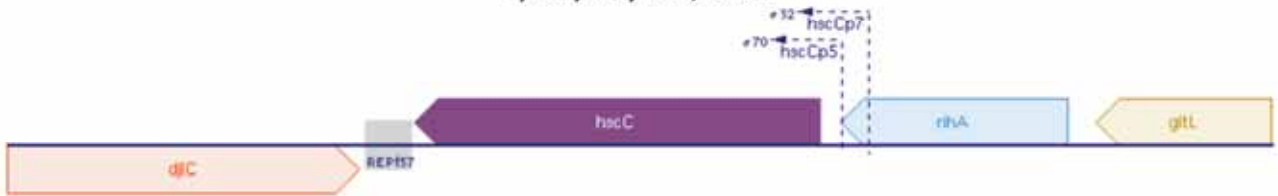

***rpoS* ( $\sigma^{38}$ ) Gene Local Context**  
 Synonyms: *sigS*, *otsX*, *abrD*, *appR*, *csi2*, *dpeB*, *katF*, *nur*, sigma 38 factor, sigma 5 factor,  $\sigma^5$

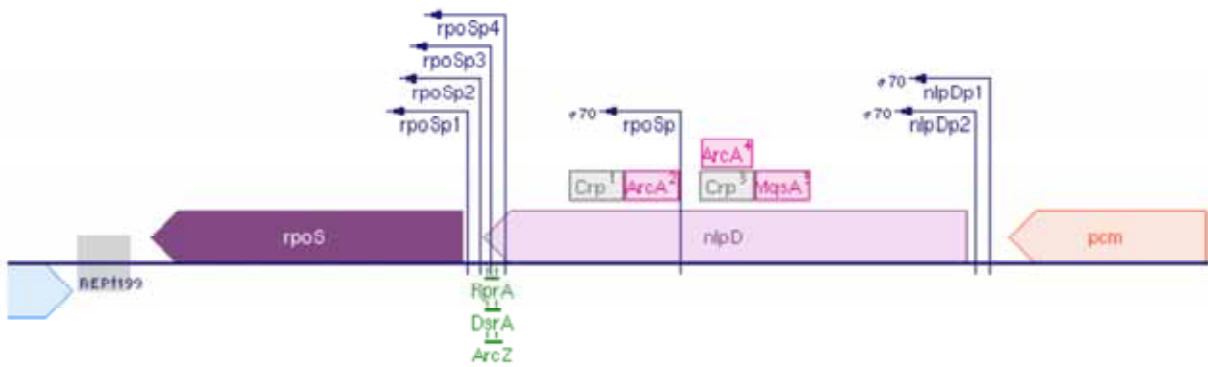

***rssB* (Anti- $\sigma^{38}$ ) Gene Local Context**  
 Synonyms: *yehL*, *sprE*, *hnr*

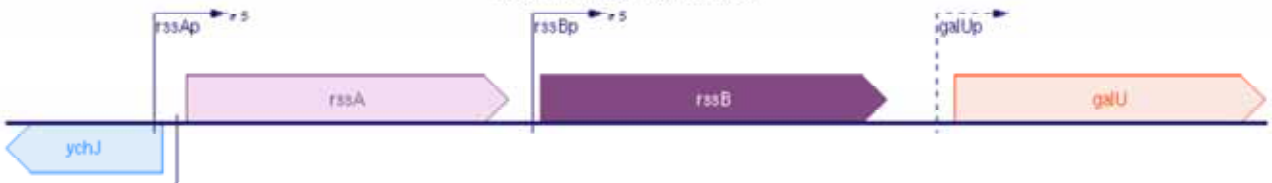

***rpoH* ( $\sigma^{32}$ ) Gene Local Context**  
 Synonyms: *fam*, *hin*, *htpR*, sigma H factor, sigma H, sigma 32, sigma 32 factor,  $\sigma^{32}$

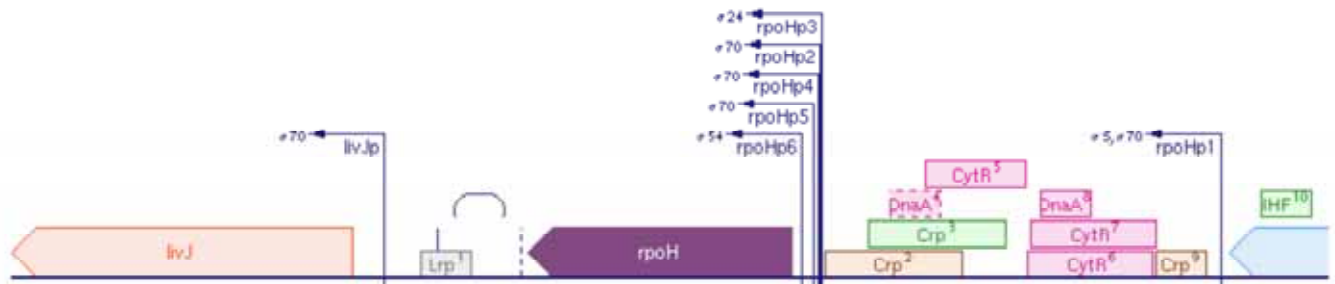

***dnaK* (Anti- $\sigma^{32}$ ) Gene Local Context**  
 Synonyms: *groPF*, *groPC*, *seg*, *grpF*, *grpC*, *groPAB*, Hsp70 chaperone DnaK, heat shock protein 70kDa

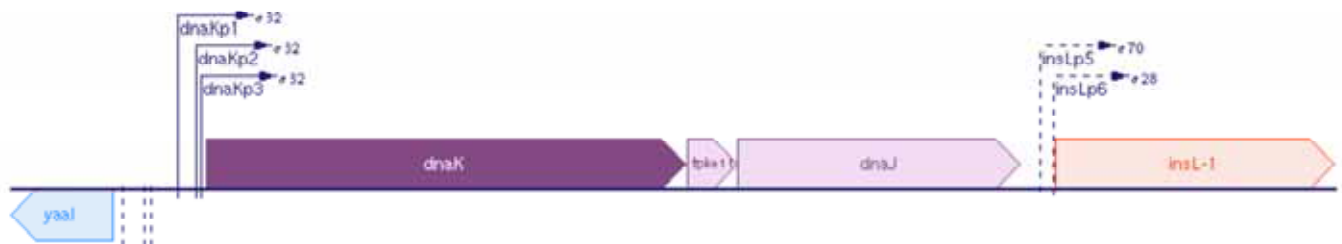

***fliA* ( $\sigma^{28}$ ) Gene Local Context**  
 Synonyms: *rpoF*, *flaD*, sigma F factor, sigma 28 factor,  $\sigma^{28}$

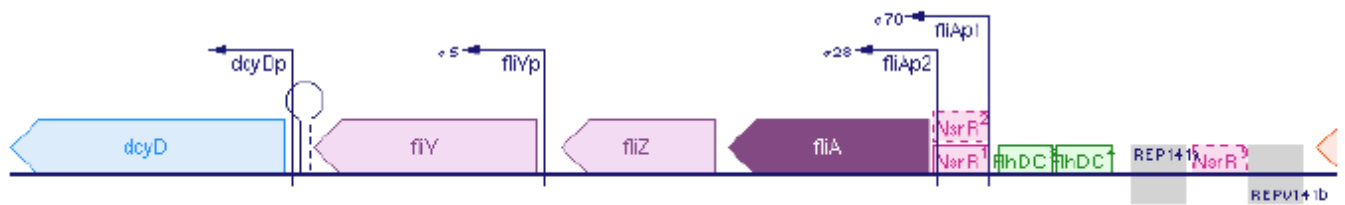

***flgM* (Anti- $\sigma^{28}$ ) Gene Local Context**  
 Synonyms: none

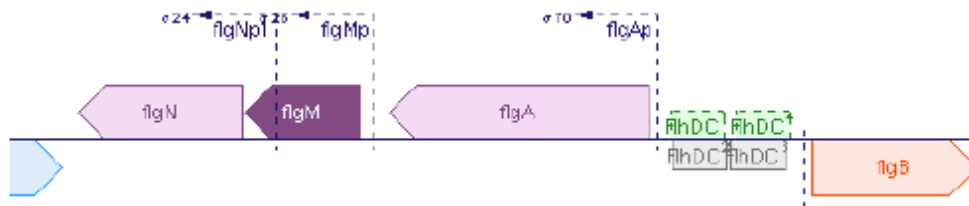

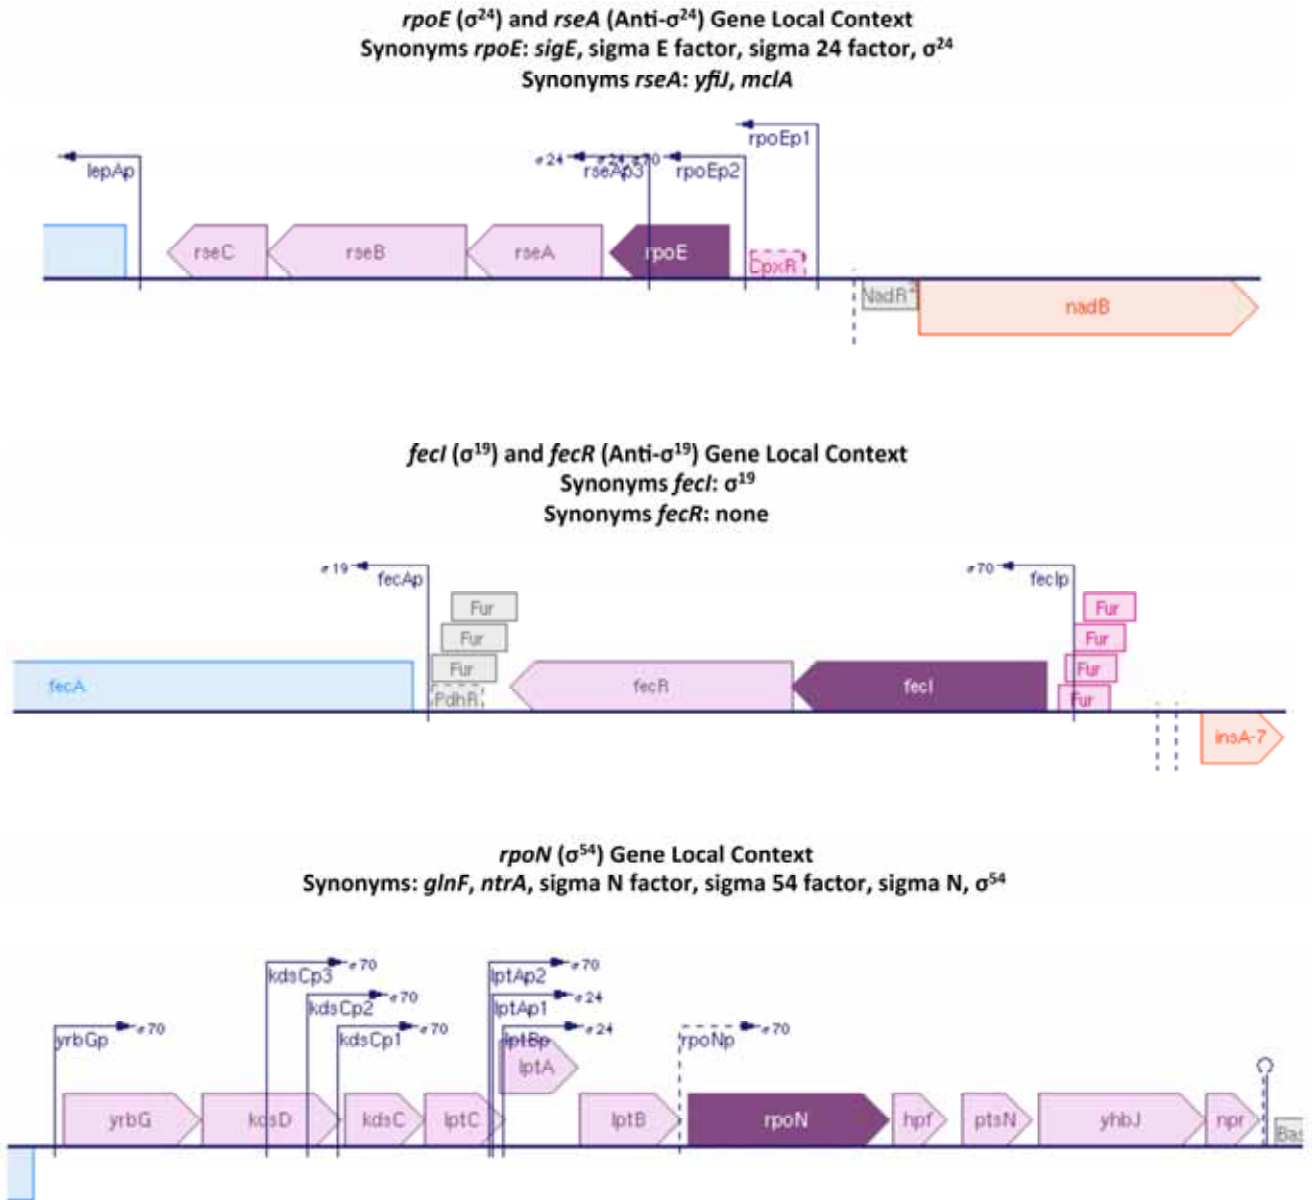

**Supplementary Fig. (1).** Graphical schemes of organization and the genomic context of genes coding for  $\sigma$  factors and anti- $\sigma$  factors discussed in this review. Additional information of these genes can be found on the EcoCyc database (<http://ecocyc.org/>).
